# Supplementary material for: Comprehensive Characterization of a Novel Bacteriophage, vB_VhaS_MAG7 against a Fish Pathogenic Strain of Vibrio harveyi and Its In Vivo Efficacy in Phage Therapy Trials
Source: MDPI journal article supplement (doi:10.3390/ijms24098200), 2023-05-03

**Figure S1. VIRIDIC generated heatmap incorporating intergenomic similarity values (right half) and alignment indicators (left half and top annotation).**

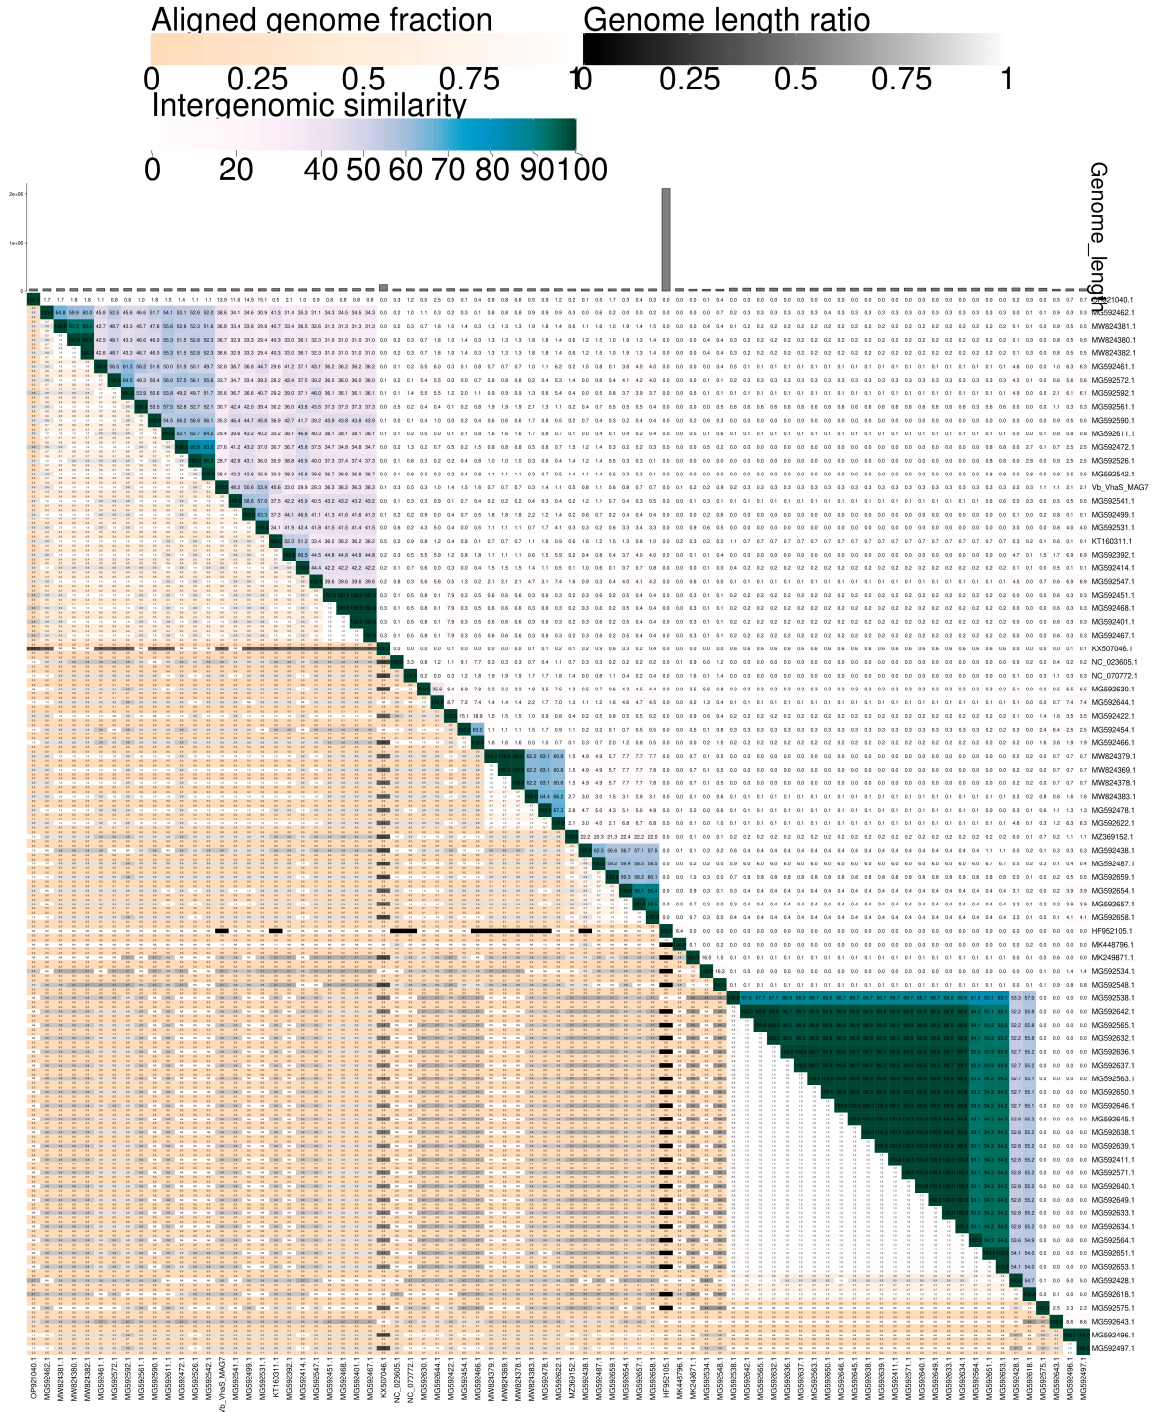

Supplement: s1 [file s1]
